# Supplementary material for: Stabilization of Human Serum Albumin by the Binding of Phycocyanobilin, a Bioactive Chromophore of Blue-Green Alga Spirulina: Molecular Dynamics and Experimental Study
Source: PubMed Central journal article supplement (PMC5154526; doi:10.1371/journal.pone.0167973), 2016-12-13

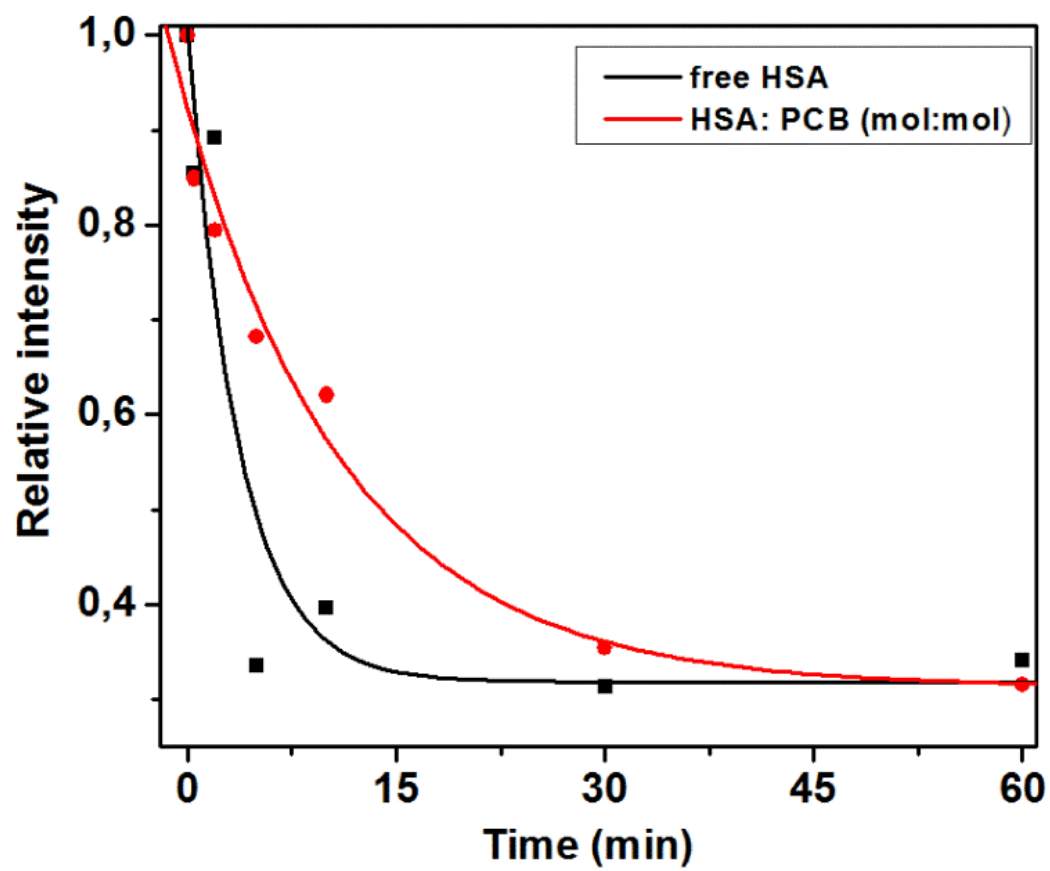

Supplement: pone.0167973.s009.pdf [file pone.0167973.s009.pdf]
