# Supplementary material for: Stabilization of Human Serum Albumin by the Binding of Phycocyanobilin, a Bioactive Chromophore of Blue-Green Alga Spirulina: Molecular Dynamics and Experimental Study
Source: PubMed Central journal article supplement (PMC5154526; doi:10.1371/journal.pone.0167973), 2016-12-13
Supplement: pone.0167973.s010.pdf [file pone.0167973.s010.pdf]

| Type of interaction | Binding site II A | Binding site IB              |
|---------------------|-------------------|------------------------------|
| Hydrogen bonds      | R222, R257, R218  | R117, E141, Y161             |
| Salt bridges        | K199              | R145, R186                   |
| Stacking/CH- $\pi$  | R218, W214, F211  | R186, E141                   |
| Hydrophobic         | L238, I290, A291  | L115, P118, F165, L178, L182 |
