# Supplementary material for: Stabilization of Human Serum Albumin by the Binding of Phycocyanobilin, a Bioactive Chromophore of Blue-Green Alga Spirulina: Molecular Dynamics and Experimental Study
Source: PubMed Central journal article supplement (PMC5154526; doi:10.1371/journal.pone.0167973), 2016-12-13
Supplement: pone.0167973.s011.pdf [file pone.0167973.s011.pdf]

| <b>Type of secondary structure</b> | <b>Free HSA</b> | <b>HSA: phycocyanobilin<br/>(1:1; mol:mol)</b> |
|------------------------------------|-----------------|------------------------------------------------|
| $\alpha$ helix (%)                 | 50.4 $\pm$ 2.1  | 55.2 $\pm$ 1.8                                 |
| $\beta$ sheet (%)                  | 21.1 $\pm$ 1.3  | 20.1 $\pm$ 1.5                                 |
| random coil (%)                    | 8.8 $\pm$ 1.3   | 4.8 $\pm$ 0.7                                  |
| $\beta$ turn (%)                   | 11.0 $\pm$ 0.5  | 11.0 $\pm$ 0.6                                 |
| $\beta$ -antiparallel sheet (%)    | 8.7 $\pm$ 0.8   | 8.9 $\pm$ 0.9                                  |
